# Supplementary material for: Comparison of the variability in mortality data generated by CDC bottle bioassay, WHO tube test, and topical application bioassay using Aedes aegypti mosquitoes
Source: Parasit Vectors. 2022 Dec 20;15:476. doi: 10.1186/s13071-022-05583-2 (PMC9769033; doi:10.1186/s13071-022-05583-2)
Supplement: Supplementary file 1 — Additional file 1. CDC Bottle Bioassay Data. [file 13071_2022_5583_MOESM1_ESM.csv]

id	date	concentration	experiment	total.mosquitoes	number.dead
MC1.1	1.5.22	0	dose.response	26	0
MC1.5	1.5.22	4.806791626	dose.response	26	2
MC1.6	1.5.22	18.79523942	dose.response	25	18
MC1.7	1.6.22	0	dose.response	27	0
MC1.8	1.6.22	4.806791626	dose.response	26	5
MC1.9	1.6.22	6.751394206	dose.response	24	2
MC1.10	1.6.22	9.895516305	dose.response	26	4
MC1.12	1.6.22	18.79523942	dose.response	25	17
MC1.14	1.6.22	29.70258821	dose.response	25	24
MC1.15	1.13.22	0	dose.response	25	0
MC1.16	1.13.22	4.806791626	dose.response	18	13
MC1.17	1.13.22	6.751394206	dose.response	25	19
MC1.18	1.13.22	9.895516305	dose.response	25	1
MC1.19	1.13.22	18.79523942	dose.response	25	6
MC1.20	1.13.22	29.70258821	dose.response	25	17
MC1.21	1.18.22	0	dose.response	25	0
MC1.22	1.18.22	4.806791626	dose.response	25	13
MC1.23	1.18.22	6.751394206	dose.response	25	12
MC1.24	1.18.22	9.895516305	dose.response	25	22
MC1.25	1.18.22	18.79523942	dose.response	25	23
MC1.26	1.18.22	29.70258821	dose.response	25	25
MC1.27	1.20.22	0	dose.response	26	0
MC1.28	1.20.22	4.806791626	dose.response	26	0
MC1.29	1.20.22	6.751394206	dose.response	25	10
MC1.30	1.20.22	9.895516305	dose.response	26	18
MC1.31	1.20.22	18.79523942	dose.response	26	19
MC1.32	1.20.22	29.70258821	dose.response	26	26
MC1.33	1.20.22	4.806791626	dose.response	26	7
MC1.52	3.10.22	0	fixed.dose	26	0
MC1.53	3.10.22	3.894275516	fixed.dose	26	10
MC1.54	3.10.22	3.894275516	fixed.dose	27	23
MC1.55	3.10.22	3.894275516	fixed.dose	27	5
MC1.56	3.10.22	3.894275516	fixed.dose	26	14
MC1.57	3.10.22	3.894275516	fixed.dose	26	6
MC1.58	3.17.22	0	fixed.dose	26	0
MC1.59	3.17.22	3.894275516	fixed.dose	26	3
MC1.60	3.17.22	3.894275516	fixed.dose	27	7
MC1.61	3.17.22	3.894275516	fixed.dose	26	19
MC1.62	3.17.22	3.894275516	fixed.dose	27	7
MC1.63	3.17.22	3.894275516	fixed.dose	26	1
