# Supplementary material for: Comparison of the variability in mortality data generated by CDC bottle bioassay, WHO tube test, and topical application bioassay using Aedes aegypti mosquitoes
Source: Parasit Vectors. 2022 Dec 20;15:476. doi: 10.1186/s13071-022-05583-2 (PMC9769033; doi:10.1186/s13071-022-05583-2)
Supplement: Supplementary file 2 — Additional file 2. WHO Tube Test Data. [file 13071_2022_5583_MOESM2_ESM.csv]

id	date	concentration	experiment	total.mosquitoes	number.dead
MC1.18	3.21.22	0	dose.response	27	0
MC1.19	3.21.22	0.5	dose.response	23	6
MC1.20	3.21.22	0.7	dose.response	25	9
MC1.21	3.21.22	1	dose.response	25	11
MC1.22	3.21.22	1.5	dose.response	19	10
MC1.23	3.21.22	2	dose.response	25	20
MC1.24	3.22.22	0	dose.response	24	1
MC1.25	3.22.22	0.5	dose.response	22	6
MC1.26	3.22.22	0.7	dose.response	22	1
MC1.27	3.22.22	1	dose.response	21	9
MC1.28	3.22.22	1.5	dose.response	24	7
MC1.29	3.22.22	2	dose.response	24	18
MC1.30	3.30.22	0	dose.response	25	0
MC1.31	3.30.22	0.5	dose.response	28	12
MC1.32	3.30.22	0.7	dose.response	25	13
MC1.33	3.30.22	1	dose.response	26	15
MC1.34	3.30.22	1.5	dose.response	25	14
MC1.35	3.30.22	2	dose.response	26	22
MC1.36	4.20.22	0	dose.response	24	0
MC1.37	4.20.22	0.7	dose.response	27	19
MC1.38	4.20.22	1	dose.response	25	16
MC1.39	4.20.22	1.5	dose.response	24	22
MC1.40	4.20.22	2	dose.response	21	15
MC1.41	4.20.22	5	dose.response	22	22
MC1.42	4.21.22	0	dose.response	25	0
MC1.43	4.21.22	0.7	dose.response	20	10
MC1.44	4.21.22	1	dose.response	23	11
MC1.45	4.21.22	1.5	dose.response	25	21
MC1.46	4.21.22	2	dose.response	24	24
MC1.47	4.21.22	5	dose.response	21	19
MC1.48	4.25.22	0	dose.response	23	0
MC1.49	4.25.22	0.7	dose.response	22	16
MC1.50	4.25.22	1	dose.response	25	22
MC1.51	4.25.22	1.5	dose.response	28	25
MC1.52	4.25.22	2	dose.response	25	25
MC1.53	4.25.22	5	dose.response	22	21
MC1.54	4.28.22	0	dose.response	24	0
MC1.55	4.28.22	0.7	dose.response	23	8
MC1.56	4.28.22	1	dose.response	25	15
MC1.57	4.28.22	1.5	dose.response	18	17
MC1.58	4.28.22	2	dose.response	23	23
MC1.59	4.28.22	5	dose.response	23	19
MC1.60	5.10.22	0	fixed.dose	25	0
MC1.61	5.10.22	1	fixed.dose	29	22
MC1.62	5.10.22	1	fixed.dose	20	15
MC1.63	5.10.22	1	fixed.dose	26	18
MC1.64	5.10.22	1	fixed.dose	29	19
MC1.65	5.10.22	1	fixed.dose	31	27
MC1.66	5.11.22	0	fixed.dose	23	0
MC1.67	5.11.22	1	fixed.dose	25	21
MC1.68	5.11.22	1	fixed.dose	27	22
MC1.69	5.11.22	1	fixed.dose	24	20
MC1.70	5.11.22	1	fixed.dose	19	18
MC1.71	5.11.22	1	fixed.dose	21	17
