# Supplementary material for: Comparison of the variability in mortality data generated by CDC bottle bioassay, WHO tube test, and topical application bioassay using Aedes aegypti mosquitoes
Source: Parasit Vectors. 2022 Dec 20;15:476. doi: 10.1186/s13071-022-05583-2 (PMC9769033; doi:10.1186/s13071-022-05583-2)
Supplement: Supplementary file 3 — Additional file 3. Topical Application Bioassay Data. [file 13071_2022_5583_MOESM3_ESM.csv]

id	date	weight.mg.combined	weight.per.mosquito	concentration.ng.per.ml	experiment	total.mosquitoes	number.dead
MC1.1	12.1.21	40.9	1.636	0	dose.response	25	0
MC1.2	12.1.21	47.2	1.888	0.655101369	dose.response	25	2
MC1.3	12.1.21	46.1	1.844	1.810532764	dose.response	25	6
MC1.4	12.1.21	44.6	1.784	4.806791626	dose.response	25	20
MC1.5	12.1.21	45.5	1.82	6.751394206	dose.response	25	24
MC1.6	12.1.21	45.7	1.828	18.79523942	dose.response	25	25
MC1.10	12.29.21	50.9	2.036	0	dose.response	25	1
MC1.11	12.29.21	52.5	2.1	0.655101369	dose.response	25	2
MC1.12	12.29.21	48.6	1.944	1.810532764	dose.response	25	13
MC1.13	12.29.21	50.5	2.02	4.806791626	dose.response	25	24
MC1.14	12.29.21	48.7	1.948	6.751394206	dose.response	25	25
MC1.15	12.29.21	53.8	2.152	18.79523942	dose.response	25	25
MC1.16	12.30.21	50.1	2.004	0	dose.response	25	0
MC1.17	12.30.21	48.3	1.932	0.655101369	dose.response	25	3
MC1.18	12.30.21	56.1	2.244	1.810532764	dose.response	25	17
MC1.19	12.30.21	48.9	1.956	4.806791626	dose.response	25	25
MC1.20	12.30.21	56.2	2.248	6.751394206	dose.response	25	25
MC1.21	12.30.21	53.8	2.152	18.79523942	dose.response	25	25
MC1.27	1.3.22	53.1	2.124	0	dose.response	25	1
MC1.28	1.3.22	43	1.72	0.655101369	dose.response	25	7
MC1.29	1.3.22	47.3	1.892	0.954462461	dose.response	25	11
MC1.30	1.3.22	49.8	1.992	1.810532764	dose.response	25	13
MC1.31	1.3.22	47.6	1.904	4.806791626	dose.response	25	24
MC1.32	1.3.22	41.3	1.652	18.79523942	dose.response	25	25
MC1.33	1.24.22	50.6	2.024	0	dose.response	25	2
MC1.34	1.24.22	47.7	1.908	0.655101369	dose.response	25	6
MC1.35	1.24.22	50.5	2.02	0.954462461	dose.response	25	15
MC1.36	1.24.22	48.9	1.956	1.810532764	dose.response	25	21
MC1.37	1.24.22	44.5	1.78	6.751394206	dose.response	25	25
MC1.38	1.24.22	47.1	1.884	18.79523942	dose.response	25	25
MC1.63	3.7.22	67.7	2.708	0	fixed.dose	25	0
MC1.64	3.7.22	67.4	2.696	1.484853674	fixed.dose	25	6
MC1.65	3.7.22	59.5	2.38	1.484853674	fixed.dose	24	6
MC1.66	3.7.22	66.9	2.676	1.484853674	fixed.dose	25	6
MC1.67	3.7.22	63.4	2.536	1.484853674	fixed.dose	25	7
MC1.68	3.7.22	64.9	2.596	1.484853674	fixed.dose	25	11
MC1.69	4.18.22	57.3	2.292	0	fixed.dose	25	4
MC1.70	4.18.22	60.3	2.412	1.484853674	fixed.dose	25	10
MC1.71	4.18.22	61.4	2.456	1.484853674	fixed.dose	25	11
MC1.72	4.18.22	55.5	2.22	1.484853674	fixed.dose	25	16
MC1.73	4.18.22	54.8	2.192	1.484853674	fixed.dose	25	16
MC1.74	4.18.22	63.7	2.548	1.484853674	fixed.dose	25	11
